# Supplementary material for: Characterization of the γδ T‐cell compartment during infancy reveals clear differences between the early neonatal period and 2 years of age
Source: PubMed Central journal article supplement — Immunol Cell Biol. 2019 Dec 1;98(1):79–87. doi: 10.1111/imcb.12303 (PMC7003854; doi:10.1111/imcb.12303), 2019-12-01
Supplement: IMCB-98-79-s001.pdf [file IMCB-98-79-s001.pdf]

**a**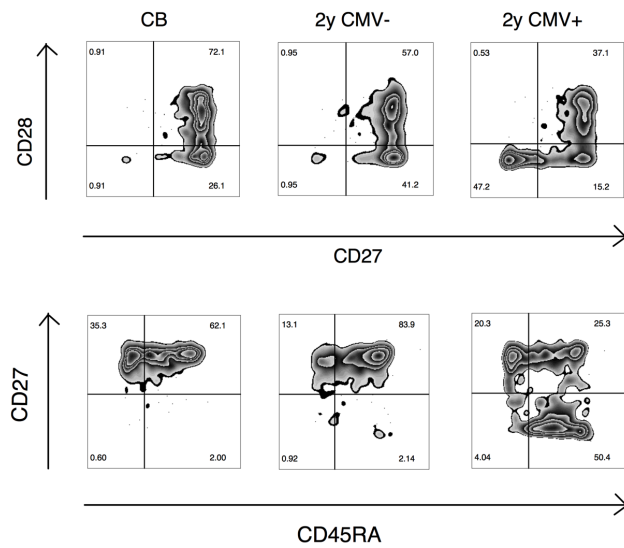**b**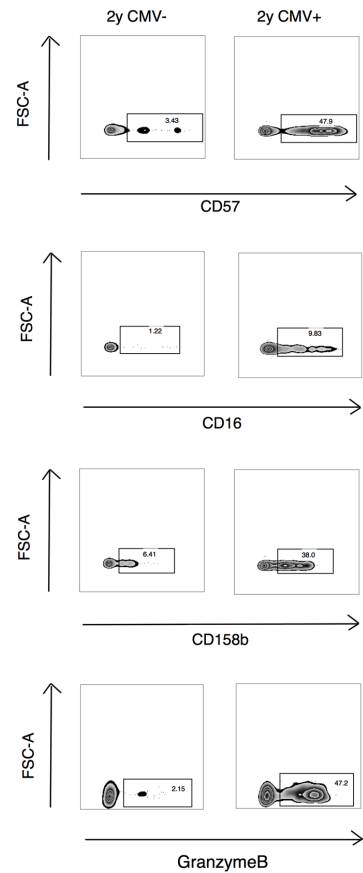

**Supplementary figure 2. Example gating of V $\delta$ 1 cells in CB, and PBMCs from CMV- and CMV+ 2-year-old children.**

**(a)** Example gating of CD27CD28 and CD27CD45RA in V $\delta$ 1<sup>+</sup>  $\gamma\delta$  T-cells from CB and PBMCs from CMV- and CMV+ 2-year-old children. **(b)** Example gating of CD57, CD16, CD158b, and Granzyme B in V $\delta$ 1<sup>+</sup>  $\gamma\delta$  T-cells in PBMCs from CMV- and CMV+ 2-year-old children. Representative samples are shown.

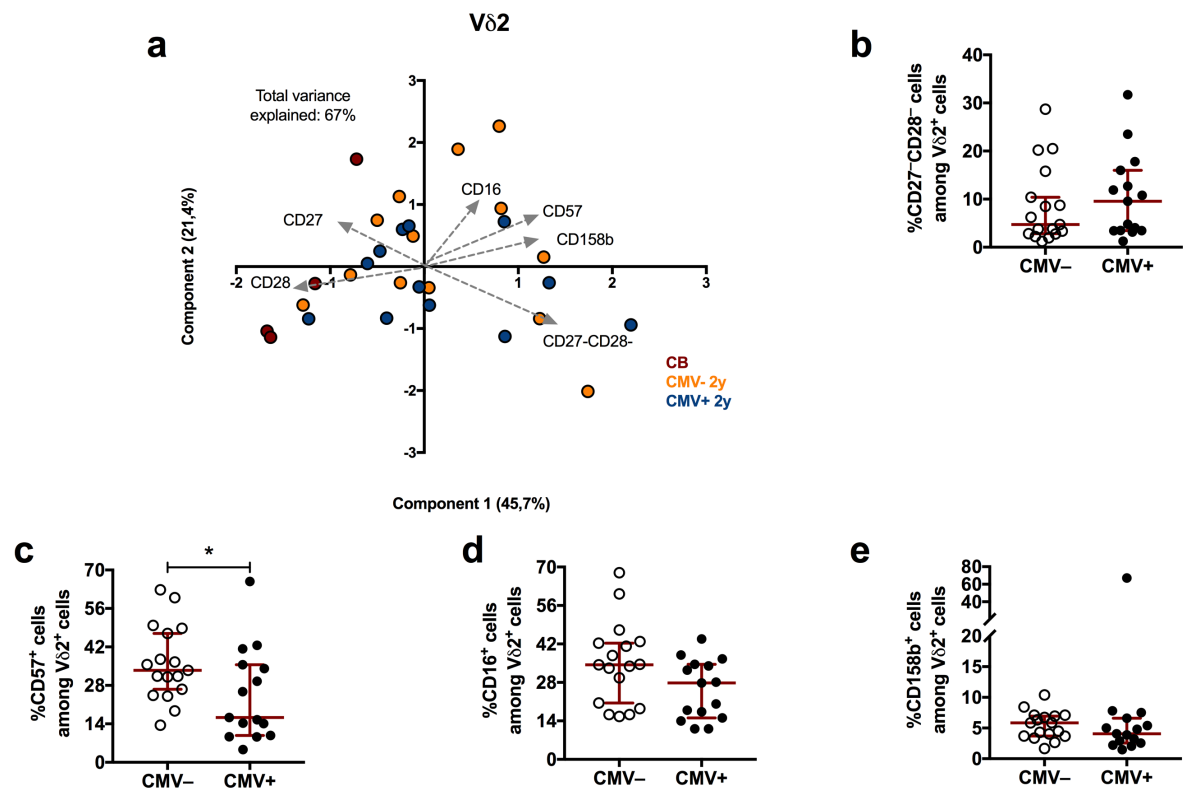

**Supplementary figure 3. CMV infection and the Vδ2 phenotype at 2 years of age.**

**(a)** PCA analysis of the Vδ2 phenotype comparing CB (red) (n=4), and CMV negative (CMV-, yellow) (n=13), and CMV infected (CMV+, blue) (n=12) 2-year-old children. The frequencies of CD28<sup>+</sup>, CD27<sup>+</sup>, CD27<sup>-</sup>CD28<sup>-</sup>, CD57<sup>+</sup>, CD16<sup>+</sup>, CD158b<sup>+</sup>, and CD45RA<sup>+</sup> cells among the Vδ2<sup>+</sup> cells are included in the analysis.

The frequency of CD27<sup>-</sup>CD28<sup>-</sup> **(b)**, CD57<sup>+</sup> **(c)**, CD16<sup>+</sup> **(d)**, and CD158b<sup>+</sup> **(e)** cells among the Vδ2<sup>+</sup> cells between CMV- (n=17) and CMV+ (n=15) 2-year-old children.
